# 1 **Global patterns and rates of habitat transitions across the eukaryotic tree of life**

2

3 Mahwash Jamy<sup>1</sup>, Charlie Biber<sup>1</sup>, Daniel Vaulot<sup>2,3</sup>, Aleix Obiol<sup>4</sup>, Homgmei Jing<sup>5</sup>, Sari

4 Peura<sup>6,7</sup>, Ramon Massana<sup>4</sup>, Fabien Burki<sup>1,7\*</sup>

5

6 <sup>1</sup> Department of Organismal Biology (Systematic Biology), Uppsala University, Uppsala, Sweden

7 <sup>2</sup> Sorbonne Université, CNRS, UMR7144, Team ECOMAP, Station Biologique, Roscoff, France

8 <sup>3</sup> Asian School of the Environment, Nanyang Technological University, Singapore

9 <sup>4</sup> Department of Marine Biology and Oceanography, Institut de Ciències del Mar (ICM-CSIC), Barcelona, Spain

10 <sup>5</sup> CAS Key Lab for Experimental Study Under Deep-sea Extreme Conditions, Institute of Deep-sea Science and  
11 Engineering, Chinese Academy of Sciences, Sanya, China

12 <sup>6</sup> Department of Ecology and Genetics (Limnology), Uppsala University, Uppsala, Sweden

13 <sup>7</sup> Science for Life Laboratory, Uppsala University, Sweden

14

15 \*Corresponding author: [fabien.burki@ebc.uu.se](mailto:fabien.burki@ebc.uu.se)

16

## 17 **Abstract**

18 The successful colonisation of new habitats has played a fundamental role during the evolution of life.

19 Salinity is one of the strongest barriers for organisms to cross, which has resulted in the evolution of

20 distinct marine and terrestrial (including both freshwater and soil) communities. Although microbes

21 represent by far the vast majority of eukaryote diversity, the role of the salt barrier in shaping the

22 diversity across the eukaryotic tree is poorly known. Traditional views suggest rare and ancient

23 marine-terrestrial transitions, but this view is being challenged by the discovery of several recently

24 transitioned lineages. Here, we investigate habitat evolution across the tree of eukaryotes using a

25 unique set of taxon-rich environmental phylogenies inferred from a combination of long-read and

26 short-read metabarcoding data spanning the ribosomal DNA operon. Our results show that overall

27 marine and terrestrial microbial communities are phylogenetically distinct, but transitions have  
28 occurred in both directions in almost all major eukaryotic lineages, with at least 350 transition events  
29 detected. Some groups have experienced relatively high rates of transitions, most notably fungi for  
30 which crossing the salt barrier has most likely been an important aspect of their successful  
31 diversification. At the deepest phylogenetic levels, ancestral habitat reconstruction analyses suggest  
32 that eukaryotes may have first evolved in non-saline habitats, and that the two largest known  
33 eukaryotic assemblages (TSAR and Amorphea) arose in different habitats. Overall, our findings  
34 indicate that crossing the salt barrier has played an important role in eukaryotic evolution by providing  
35 new ecological niches to fill.

36 **Main text**

37 Adapting to new environments with very different physicochemical properties represent large  
38 evolutionary steps. When successful, habitat transitions can be important drivers of evolution and  
39 trigger radiations<sup>1-4</sup>. The marine-terrestrial boundary (here terrestrial encompassing both freshwater  
40 and soil<sup>5,6</sup>)—the so-called salt barrier—is considered one of the most difficult barriers to cross,  
41 because salinity preference is a complex trait that requires the evolution of multi-gene pathways for  
42 physiological adaptations<sup>7-10</sup>. These adaptations have been best studied in macroorganisms, for which  
43 the recorded marine-terrestrial transitions are few<sup>11-13</sup>. Microbes (prokaryotic and eukaryotic) are also  
44 typically regarded as infrequently crossing the salt barrier in spite of much larger population sizes and  
45 high dispersal ability<sup>12,14</sup>, but the role of the salt barrier as an evolutionary driver of microbial diversity  
46 remains poorly understood. For bacteria, higher habitat transition rates than anticipated have been  
47 reported<sup>15</sup>. For microbial eukaryotes, which represent the vast majority of eukaryotic diversity, no data  
48 exist to infer the global patterns and rates of habitat transitions at a broad phylogenetic scale. Extant  
49 marine and terrestrial eukaryotic communities are distinct in terms of composition and abundance of  
50 taxa<sup>6,16</sup>, a pattern that has been attributed to rare and ancient transitions between marine and terrestrial  
51 environments<sup>14,17-22</sup>. However, increasing inferences of recent transitions in specific clades such as  
52 dinoflagellates suggest that the strength of the salt barrier might not be as strong as previously  
53 envisioned<sup>23-26</sup>.

54  
55 In this study, we used a unique hybrid approach combining high-throughput long-read and short-read  
56 environmental sequencing to infer habitat evolution across the eukaryotic tree of life. We newly  
57 generated over 10 million long environmental reads (ca. 4500 bp of the ribosomal DNA operon) from  
58 21 samples spanning marine (including euphotic and aphotic ocean zones), freshwater, and soil  
59 habitats. The increased phylogenetic signal of long-reads allowed us to establish, together with a set of  
60 phylogenomics constraints, a broad evolutionary framework for the environmental diversity of  
61 eukaryotes. We then incorporated existing, massive short-read data (~234 million reads) from a  
62 multitude of locations around the world to complement the taxonomic and habitat diversity of our  
63 dataset. With this combined dataset, we inferred the frequency, direction, and relative timing of

64 marine-terrestrial transitions during the evolution of eukaryotes; we investigated which eukaryotic  
65 lineages are more adept at crossing the salt barrier; and finally, we reconstructed the most likely  
66 ancestral habitats throughout eukaryote evolution, from the root of the tree to the origin of all major  
67 eukaryotic lineages. Our analyses represent the most comprehensive attempt to leverage  
68 environmental sequencing to infer the evolutionary history of habitat transitions across eukaryotes.

69

## 70 **Results**

### 71 **Long-read metabarcoding to obtain a comprehensive environmental phylogeny**

72 A range of samples collected globally from marine and terrestrial habitats were deeply sequenced with  
73 PacBio (Sequel II) to obtain a comprehensive long-read metabarcoding dataset spanning the broad  
74 phylogenetic diversity of eukaryotes. These samples covered all major ecosystems, including the  
75 marine euphotic and aphotic zones (surface/deep chlorophyll maximum, and  
76 mesopelagic/bathypelagic, respectively), freshwater lakes and ponds as well as tropical and boreal  
77 forest soils (see Supplementary Table 1 for details). In total, we obtained 10.7 million Circular  
78 Consensus Sequence (CCS) reads spanning ~4500 bp of the ribosomal DNA (rDNA) operon, from the  
79 18S to the 28S rDNA genes. After processing, sequences were clustered into Operational Taxonomic  
80 Units (OTUs) within each sample at 97% similarity, resulting in 16,821 high-quality OTUs. To assess  
81 the potential biases of long-read amplicon sequencing, we performed a direct comparison with  
82 Illumina data (for the V4 and V9 hypervariable regions of the rDNA gene, and 18S reads extracted  
83 from metagenomic data) previously obtained for the same DNA from three marine samples<sup>27</sup>. This  
84 comparison revealed that our long-range PCR assay followed by PacBio sequencing retrieved similar  
85 eukaryotic community snapshots, with most groups detected at comparable abundances  
86 (Supplementary Figures 1-2). Additionally, the PacBio datasets detected several taxonomic groups  
87 that are absent from the V4 and V9 datasets. Importantly, over 80% of the V4 sequences were  
88 identical to the PacBio OTUs, indicating that our protocol for CCS processing generates high-fidelity  
89 data comparable to classical short-read metabarcoding (Supplementary Figure 1).

90 We then used a phylogeny-aware method to label all OTUs with appropriate taxonomic information<sup>28</sup>  
91 (see Materials and Methods for details), and reconstructed a global eukaryotic phylogeny of  
92 environmental diversity based on the 18S-28S rDNA genes (Figure 1). In order to allow for transition  
93 rates to be estimated within a guiding taxonomic framework (see below), the major eukaryotic groups  
94 shown in Figure 1a were constrained to be monophyletic based on established relationships derived  
95 from phylogenomic inferences (reviewed in <sup>29</sup>). These major lineages were defined as rank 4 in the  
96 taxonomic scheme of an in-house database derived from the protist ribosomal reference (PR2)  
97 database<sup>30</sup> called *PR2-transitions*<sup>31</sup>. This phylogeny contains almost all known major eukaryotic  
98 lineages (Figure 1); most of the missing groups (e.g. kelp and seaweed) represent large multicellular  
99 organisms, or protists found in specific environments not sampled here (e.g. anoxic environments, see  
100 Supplementary Table 2). We also uncovered a proportion of novel diversity, i.e. OTUs highly  
101 dissimilar to reference sequences that are typically difficult to confidently assign to taxonomic groups.  
102 Long-read metabarcoding alleviates the issue of taxonomic assignment of highly diverging sequences,  
103 for example we found 863 sequences with <85% similarity to references in PR2 which were attributed  
104 a taxonomy based on their position in the tree, mostly belonging to apicomplexan parasites, fungi, and  
105 amoebozoans (Figure 1a and Supplementary Figure 3).

#### 106 **Detection of a salty divide in microbial eukaryotes**

107 The global phylogeny in Figure 1 allows to visualize habitat preferences across the eukaryotic tree of  
108 life. Overall, we observed a clear phylogenetic distinction between marine and terrestrial lineages,  
109 with almost no OTU overlap between these two communities (Figure 1b-c; Unifrac distance = 0.959,  
110 p-value < 0.001). Within the marine and terrestrial biomes, soil and freshwater communities were  
111 found to be more distinct from each other (Unifrac distance = 0.76, p-value < 0.001) than the marine  
112 euphotic and aphotic communities (Unifrac distance = 0.64, p-value < 0.001) (Figure 1b and  
113 Supplementary Figure 4). However, we detected several sequences with high identity (>97% similar)  
114 present in the marine euphotic and aphotic samples (854 OTUs), and in the soil and freshwater  
115 samples (771 OTUs), suggesting that some taxa may be generalists in these sub-habitats (Figure 1c  
116 and Supplementary Figure 5).

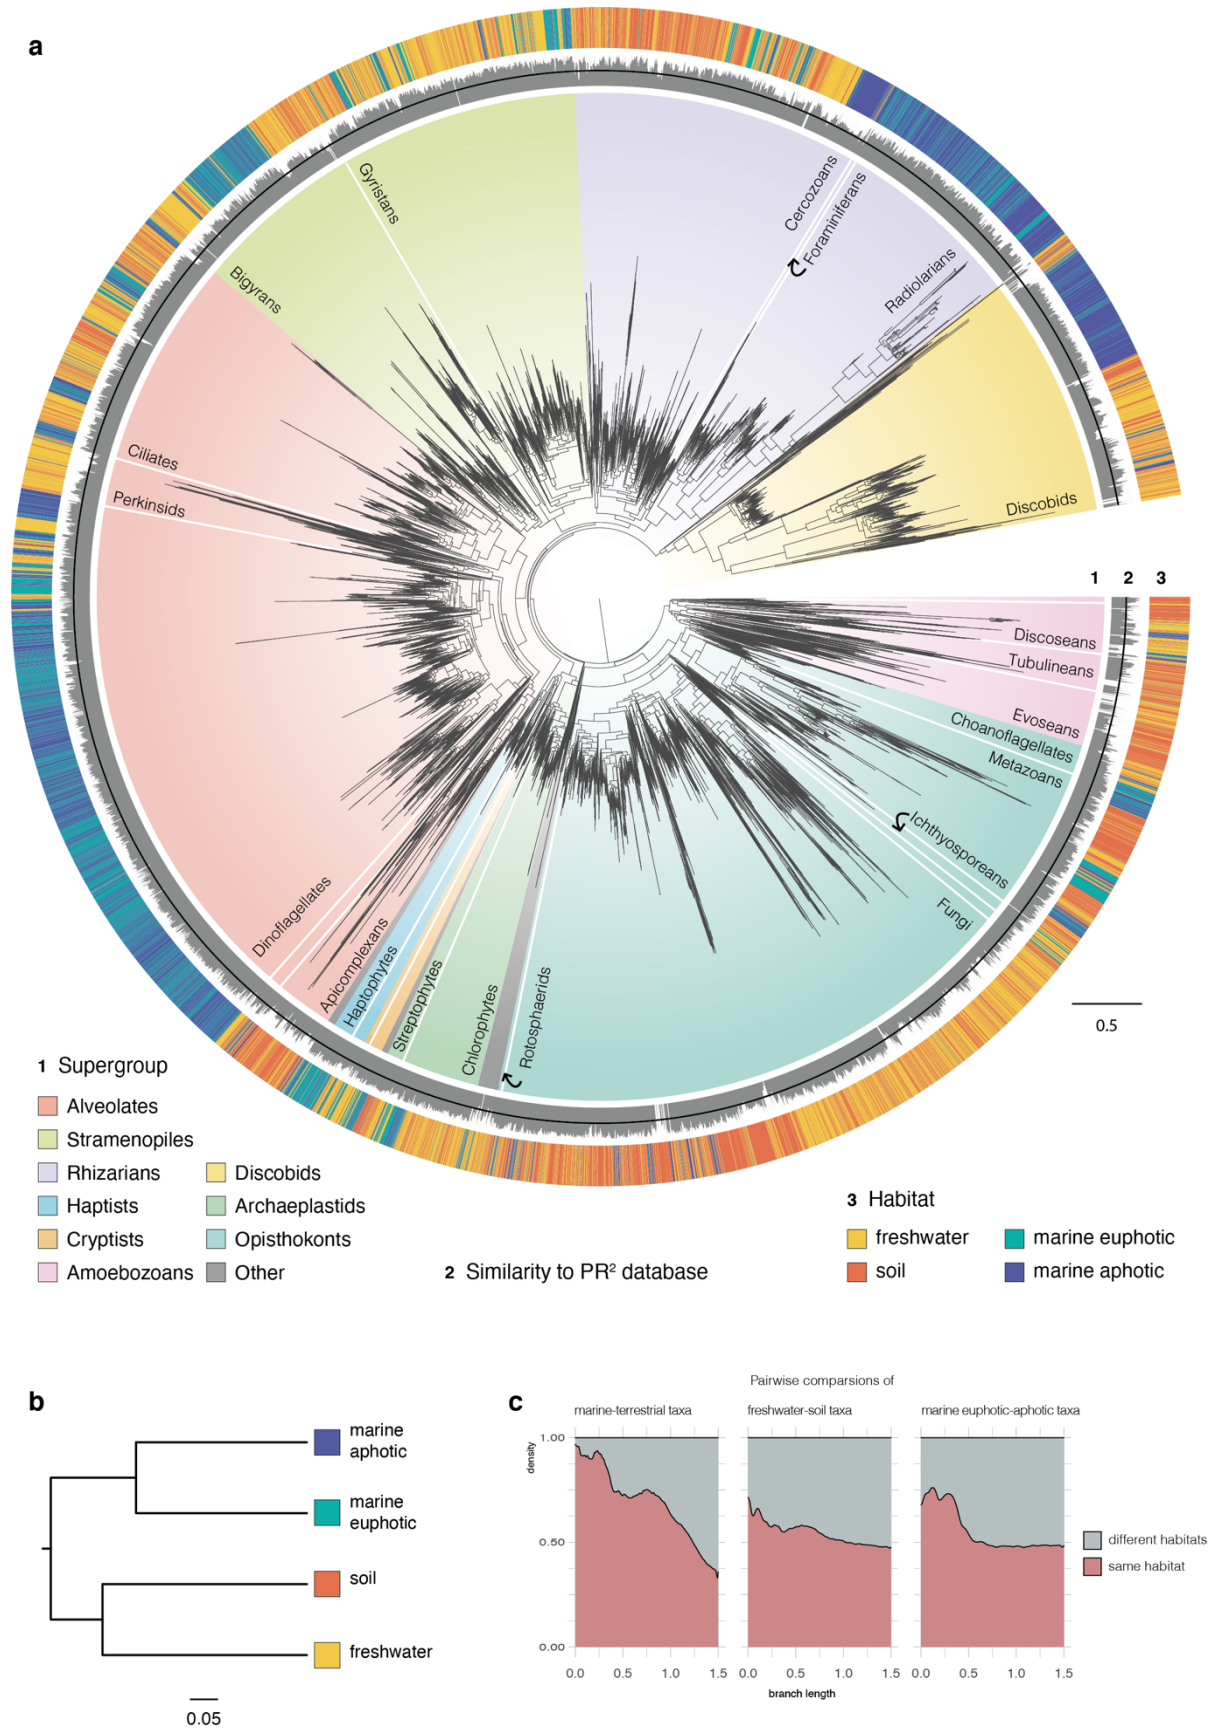

117

118 **Figure 1.** Global eukaryotic 18S-28S phylogeny from environmental samples and the distribution of habitats. **(a)**

119 This tree corresponds to the best maximum-likelihood (ML) tree inferred using an alignment with 7,160 sites

120 and the GTRCAT model in RAxML<sup>32</sup>. The tree contains 16,821 OTUs generated from PacBio sequencing of 21  
121 environmental samples. The innermost ring around the tree indicates taxonomy, and the major eukaryotic  
122 lineages considered in this study are labelled. The second ring depicts percentage similarity with the references  
123 in the PR2 database and was set with a minimum of 70 and a maximum of 100, with the black line in the middle  
124 indicating 85% similarity. The third ring depicts which habitat each OTU belongs to. **(b)** Hierarchical clustering  
125 of the four habitats based on a phylogenetic distance matrix generated using the unweighted UniFrac method. (c)  
126 Stacked density plot of branch lengths between taxa pairs from the same or different habitats. Note that this plot  
127 should be interpreted with caution as each taxa-pair does not represent independent data-points due to  
128 phylogenetic relatedness.

129  
130 We next sought to increase the number of samples and covered diversity by taking advantage of the  
131 mass of available short-read metabarcoding datasets. We gathered data from 22 studies conducted  
132 globally (including marine and terrestrial ecosystems), amounting to 234 million reads in total after  
133 processing (Supplementary Figure 6, Supplementary Table 3). We opted to use only the V4 region (ca.  
134 260 bp) of the 18S rDNA gene as it was shown to have a greater phylogenetic signal than the V9  
135 region<sup>33</sup>. The V4 reads were clustered into OTUs at 97% similarity for the marine euphotic (9977  
136 OTUs), marine aphotic (2518 OTUs), freshwater (3788 OTUs), and soil (11935 OTUs) environments  
137 (Supplementary Table 4). These short-read OTUs were then phylogenetically placed onto the global  
138 long-read-based eukaryotic phylogeny using the Evolutionary Placement Algorithm (EPA)<sup>34</sup>  
139 (Supplementary Figure 7), for which we compared the placement distributions for each sub-habitat.  
140 Interestingly, most placements occurred close to the tips of the reference tree, indicating that our long-  
141 read dataset adequately represents the diversity recovered by short-read metabarcoding  
142 (Supplementary Figure 7). Furthermore, the placement distributions for each habitat is consistent with  
143 our results based on the long-reads only, namely that marine and terrestrial communities are distinct,  
144 and at a finer level, soil and freshwater communities are more different from each other than  
145 communities in the surface and deep ocean (soil-freshwater earth mover's distance = 1.14, marine  
146 euphotic-aphotic earth mover's distance = 0.809; Supplementary Figure 8).

147

## 148 **Marine-terrestrial transition rates vary across major eukaryotic clades**

149 The above results confirm that the salt barrier leads to phylogenetically distinct eukaryotic  
150 communities. We next asked how often have transitions between marine and terrestrial habitats  
151 occurred during evolution, which eukaryotic lineages have crossed this barrier more frequently, and in  
152 which direction? To answer these questions, we calculated habitat transition rates across the global  
153 eukaryotic phylogeny by performing Bayesian ancestral state reconstructions using continuous-time  
154 markov models<sup>35</sup>. We tested a null model, where transition rates from marine to terrestrial habitats  
155 (qMT) and vice versa (qTM) are constant throughout the eukaryotic phylogeny, against a  
156 heterogeneous model where qMT and qTM are estimated separately for each major eukaryotic lineage  
157 (illustrated in Figure 1). The null model had a posterior density of log-likelihoods with a mean of -  
158 2008.45 (Supplementary Figure 9). Under this model, transitions from marine to terrestrial habitats are  
159 just as likely as the reverse across the tree. However, this general analysis hides important variations  
160 in habitat transition rates between groups, and indeed the heterogenous model presented a much better  
161 fit (log-likelihood score of -1819.91; Log Bayes Factor = 269.3; Supplementary Figure 9), indicating  
162 that habitat transition rates vary strongly across the tree.

163 To investigate in more detail the rate of habitat transition within each major eukaryotic group, we  
164 inferred taxon-rich clade-specific phylogenies by combining short-read data with the backbone  
165 phylogenies obtained from long-read data. Incorporating these short-read data allowed us to detect  
166 additional transition events that would have otherwise been missed with the long-read data alone  
167 (Supplementary Figure 10). We modelled habitat transition rates along clade-specific phylogenies  
168 containing both marine and terrestrial taxa that were sufficiently large (at least 50 tips) to get precise  
169 estimates. We also excluded discobid excavates and discosean amoebozoans as preliminary analyses  
170 showed ambiguous transition rate estimates owing to large phylogenetic uncertainty. Fungi were  
171 found to have by far the highest transition rates for a given amount of evolutionary change; we  
172 estimated around 90 expected transition events along a branch length of one substitution/site in the  
173 phylogeny. These results indicate that habitat shifts are associated with very little evolutionary change  
174 in the ribosomal DNA sequences (Figure 2a). After fungi, cryptophytes and gyristans (ochrophyte



175 algae, oomycete parasites and several free-living flagellates) had the highest global rates (around 8.2  
 176 and 3.4 and expected transitions per substitution per site).

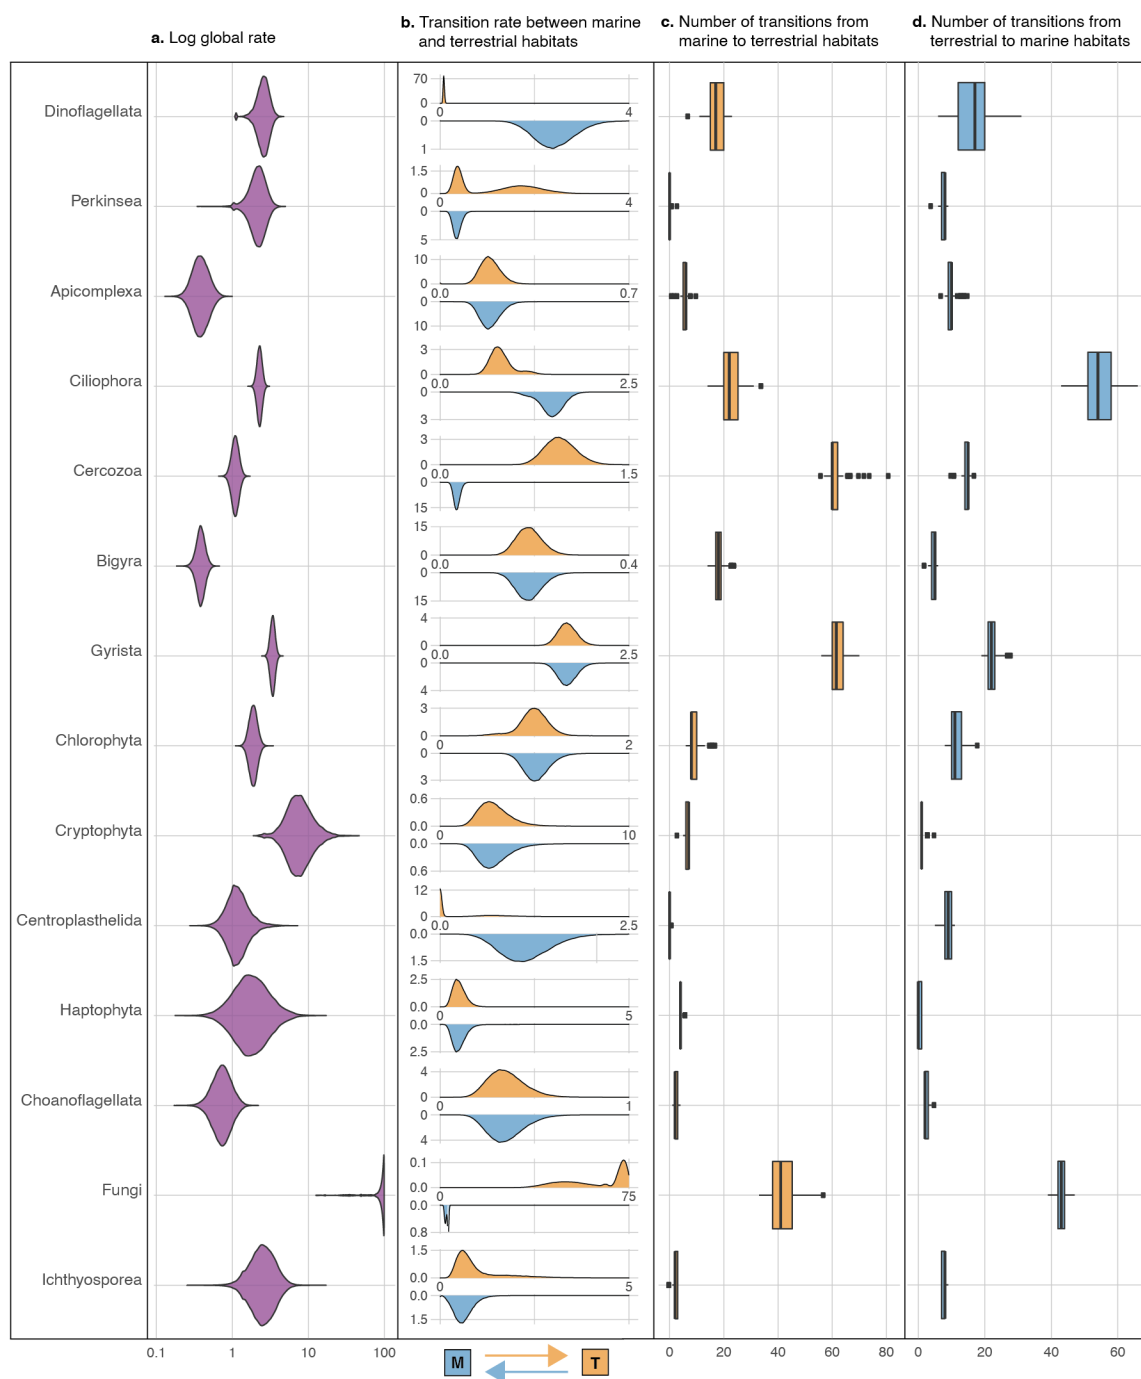

177  
 178 **Figure 2.** Habitat transition rates and number of transition events estimated for each major eukaryotic lineage.  
 179 (a) Posterior probability distributions of the global rate of habitat evolution, which indicate the overall speed at  
 180 which transitions between marine and terrestrial habitats have occurred in each clade regardless of direction.  
 181 Rates were estimated along clade-specific phylogenies (see Supplementary Figure 10) using Markov Chain

182 Monte Carlo (MCMC) in BayesTraits using a normalized transition matrix. (b) The posterior probability  
183 distribution of transition rates from marine to terrestrial habitats (top in orange), and from terrestrial to marine  
184 habitats (below in blue). (c) Number of transitions from marine to terrestrial habitats and (d) in the reverse  
185 direction for each clade as estimated by PASTML using Maximum Likelihood (see Materials and Methods for  
186 details).

187

188 At a finer phylogenetic resolution, several subclades within stramenopiles, as well as ciliates, seemed  
189 particularly adept at crossing the salt barrier, especially chrysophytes, diatoms, and spirotrich ciliates  
190 (11.8, 8.7, and 3.8 expected transition events per substitution per site respectively; Supplementary  
191 Figure 11-12). At the other extreme, groups such as bigyrans (heterotrophic stramenopiles related to  
192 gyristans) and apicomplexans (a group of parasites including the malaria pathogen) displayed the  
193 lowest habitat transition rates (around 0.4 expected transitions for every substitution per site). These  
194 results were further confirmed with sequence similarity network analyses, which showed high  
195 assortativity between marine and terrestrial sequences for bigyrans and apicomplexans (meaning that  
196 terrestrial and marine sequences formed distinct clusters at varying similarity thresholds), as opposed  
197 to gyristans and fungi, which showed low assortativity (Supplementary Figure 13).

198 Within each major eukaryotic group, we next inferred the frequency for each direction of the  
199 transitions between marine to terrestrial habitats. We found that all clades investigated had non-null  
200 transition rates in both directions, with the exception of centrohelids which had a terrestrial  
201 colonization rate that was not significantly different from zero in 99/100 trees used for calculation  
202 (Figure 2b). These results indicate that in nearly all major eukaryotic lineages containing terrestrial  
203 and marine taxa, transitions have occurred in both directions. Some clades had symmetrical transition  
204 rates, indicating that the tendency to colonize marine environments was not significantly different  
205 from the tendency to colonize terrestrial environments; this was for example the case of  
206 apicomplexans, bigyrans, gyristans, chlorophytes, cryptophytes, haptophytes, and choanoflagellates  
207 (Figure 2b). However, some groups showed marked differences in one direction or the other.  
208 Dinoflagellates, for example, show a much greater transition rate for colonizing marine habitats (about

209 31 times more likely). Ciliates have also transitioned more frequently towards marine environments,  
210 but the difference is smaller (1.8 times more likely). On the other hand, transitions to terrestrial  
211 environments were significantly more likely than the reverse direction for fungi and cercozoans (about  
212 21.5 and 7.2 times more likely, respectively). Finally, the directionality of habitat transition appears to  
213 be heterogeneous also within the major eukaryotic groups (Supplementary Figures 14-17). Indeed, for  
214 some selected subclades such as ascomycetes and basidiomycetes within fungi, the transition rates to  
215 marine environments were higher as compared to non-Dikarya fungi, although fungi as a whole  
216 showed a marked tendency to colonize terrestrial habitats ( $q_{TM} = 8.47$  vs. 1.65 respectively;  
217 Supplementary Figure 17).

218 Finally, we estimated the number of transition events within each clade by generating discrete habitat  
219 histories using a maximum likelihood method<sup>36</sup>. We conservatively counted transition events only if  
220 they led to a clade with at least two taxa in the new habitat in order to distinguish between biologically  
221 active, speciating residents from wind-blown cells, resting spores or extracellular DNA from dead  
222 cells<sup>37</sup>. Our analyses revealed at least 350 transition events occurring over eukaryotic history, though  
223 the actual number is likely to be higher when considering lineages that have gone extinct. Out of these,  
224 72 or more transition events occurred in fungi alone (39-47 transitions to marine environments  
225 detected, and 33-57 transitions to terrestrial environments detected) (Figure 2c-d). This was closely  
226 followed by gyristans and ciliates, with more than 60 putative switches each between environments  
227 (Figure 2c-d).

## 228 **Relative timing of habitat transitions during the evolution of the major eukaryotic groups**

229 We next asked when during eukaryote evolution these transitions between marine and terrestrial  
230 habitats occurred. To calculate a relative timing for all marine-terrestrial transitions, we converted the  
231 clade-specific phylogenies into chronograms with relative dates (as in <sup>38</sup>).

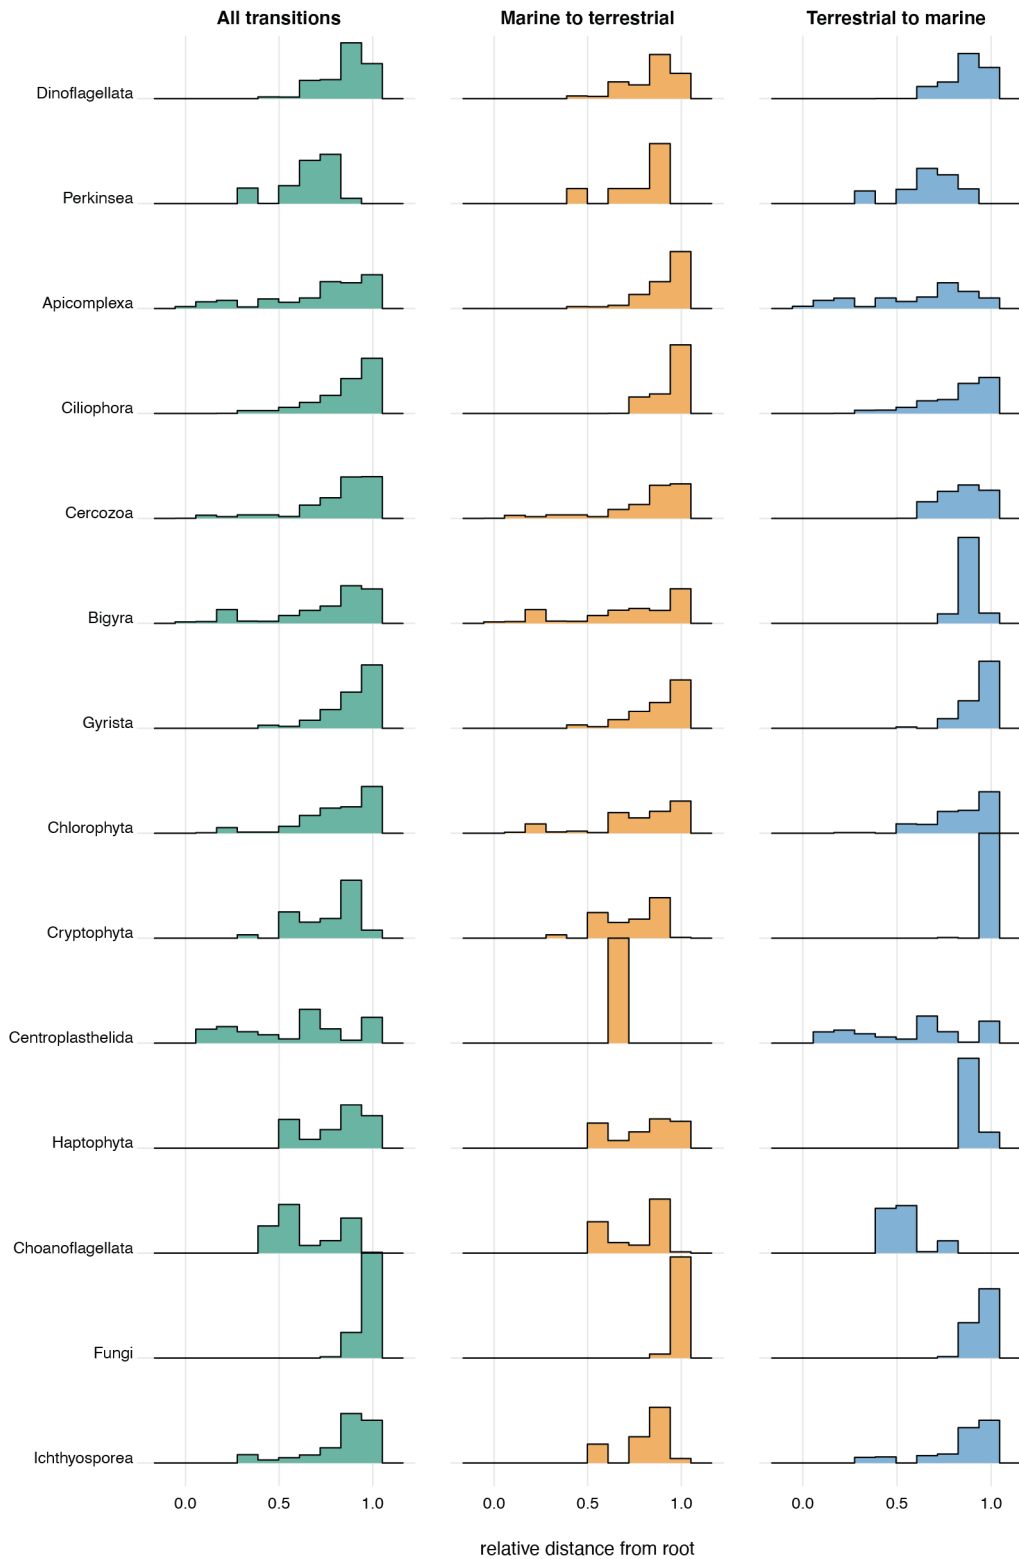

232

233 **Figure 3.** Ridgeline histogram plots displaying the timing of transition events as estimated from relative

234 chronograms obtained with Pathd8<sup>38</sup>. The x-axis depicts the relative age for each clade.

235 For each putative transition event, we measured the relative branch length from the inferred transition  
236 to the root of the clade. The general trend is that most transitions occurred relatively recently in the  
237 history of the groups (Figure 3). For instance, we detected no transition events in fungi older than 25%  
238 of the clade's history, with the vast majority of all transitions occurring in the last 10% of the time that  
239 this group has been on earth. Assuming that fungi arose around 1 billion years ago<sup>39-41</sup>, this would  
240 imply that > 90% of all marine-terrestrial transitions (at least 63 transitions according to our analyses)  
241 in fungi occurred in the last 100 million years alone, with older transitions occurring predominantly  
242 towards marine environments. The observation that most transitions occurred towards present could be  
243 due to the increased challenges of inferring transition events early in the evolution of a group because  
244 of poorer resolution of deeper nodes due to little phylogenetic signal, and/or unsuccessful transitions  
245 leading to lineage extinctions in the new habitat. However, for a few clades at least (centrohelids,  
246 bigyra, apicomplexans, cercozoans, and chlorophytes), we detected a number of early transitions in the  
247 evolution of the group (Figure 3). Interestingly, the direction of these early habitat transitions is non-  
248 overlapping. For centrohelids and apicomplexans, the early transitions were mainly towards marine  
249 environments, possibly corresponding to repeated marine colonization events at the onset of the  
250 groups' evolution. Early terrestrial colonization events were instead detected in cercozoans,  
251 chlorophytes, and bigyrans, together suggesting that early in the evolution of the major eukaryotic  
252 groups the pressure to move towards marine or terrestrial habitats was group-specific and directional.

### 253 **Ancestral habitat reconstruction of the major eukaryotic clades**

254 Our global eukaryotic phylogeny of long-environmental OTUs, combined with the group-specific  
255 phylogenies including short-read metabarcoding data, represent a very dense set of environmental  
256 information put in a phylogenetic framework. We used this information to reconstruct in a Bayesian  
257 analysis the most likely ancestral environments from the root of the eukaryotic tree through the  
258 emergence of the major groups. Inferring the ancestral habitat of the last eukaryotic common ancestor  
259 (LECA) requires information about the root itself, which remains very contentious<sup>29,42</sup>. To  
260 accommodate uncertainties for the position of the root, we performed ancestral habitat reconstruction  
261 analyses using the two most commonly proposed root positions: (1) between the discobid excavates

262 and all other eukaryotes<sup>43</sup>, and (2) between amorpheans (the group including animals, fungi and  
263 amoebozoans) and all other eukaryotes<sup>44</sup>. Both root alternatives converged towards the same habitats,  
264 suggesting with high confidence that LECA evolved in a terrestrial environment (Figure 4a).

265 From this inferred terrestrial root, our analyses suggest that two of the largest mega-assemblages of  
266 eukaryotes, likely comprising more than half of all eukaryotic diversity<sup>45</sup>, arose in different  
267 environments. On one hand, the amorphean group likely originated in a terrestrial habitat (Figure 4b),  
268 where it initially diversified into obazoans (which include well-known lineages such as animals and  
269 fungi, but also several unicellular related lineages), as well as the amoebozoans. Consistent with  
270 previous studies, we inferred a marine origin for metazoans<sup>46,47</sup>, however for two obazoan lineages–  
271 fungi and the group containing metazoans and choanoflagellates—we could not determine a clear  
272 preference for their ancestral habitats. On the other hand, our analyses indicate that the expansive  
273 TSAR clade (containing the main eukaryotic phyla stramenopiles, alveolates, and rhizarians, as well as  
274 the smaller group telonemids) most likely originated in a marine environment, following the transition  
275 of an ancestral population from a terrestrial root (Figure 4b). A marine origin is also likely for the  
276 major TSAR members, except for alveolates which were inferred to have a terrestrial origin.

277 Overall, the predicted ancestral habitats of most major eukaryotic clades match their current preferred  
278 habitat: this is for example the case for all amoebozoan lineages, radiolarians, dinoflagellates and  
279 foraminiferans. An exception is cercozoans for which a marine origin was inferred, but which now  
280 dominate terrestrial environments, particularly soils<sup>6,48</sup>. Interestingly, the results derived from the  
281 global eukaryotic phylogeny and the clade-specific phylogenies (which include short-read OTUs)  
282 were largely consistent except in two cases: the phylogeny of perkinsids changed the origin from  
283 terrestrial to marine for these parasites of animals, while the phylogeny of choanoflagellates switched  
284 from a marine to a terrestrial origin (Figure 4b).

285

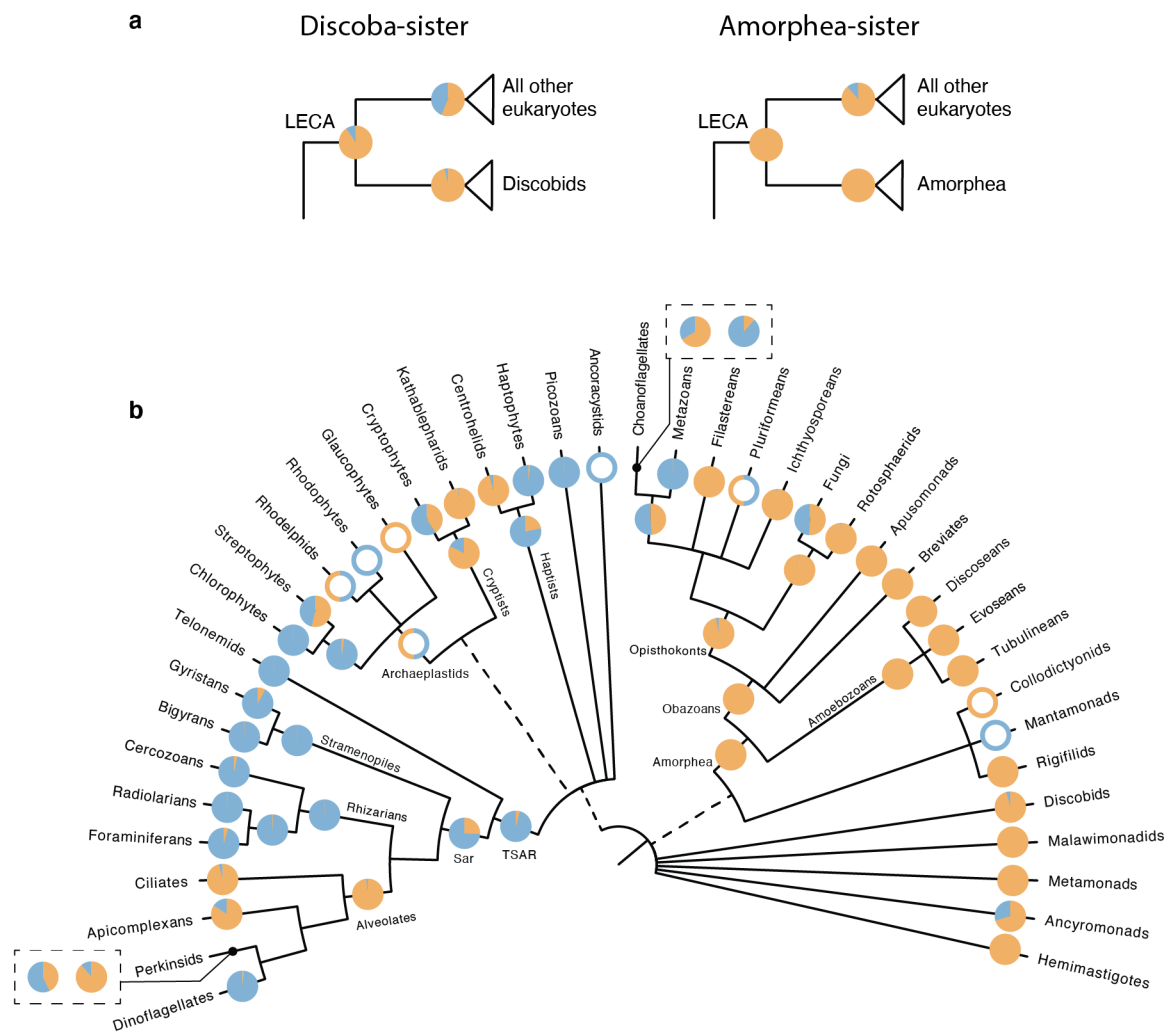

286

287 **Figure 4.** Ancestral states of major eukaryotic clades as estimated by BayesTraits on a set of 100 global PacBio  
 288 phylogenies. Pie charts at each node indicate the posterior probabilities of likelihoods for the character states as  
 289 follows: blue=marine, orange=terrestrial. Nodes with empty circles indicate wherever there was insufficient  
 290 taxon sampling to infer ancestral habitats, but a reasonable estimate was made from existing literature (See  
 291 Supplementary Note 1). (a) Ancestral habitat of the last eukaryotic common ancestor (LECA) as inferred using  
 292 two different roots. (b) Ancestral states of major eukaryotic lineages. For the two cases where the incorporation  
 293 of Illumina data inferred a different likely ancestral state, the results are shown in boxes. The pie chart on the  
 294 right was obtained using the global eukaryotic phylogeny, while the pie chart on the left was obtained from  
 295 clade-specific phylogenies. The tree is adapted from Burki et al<sup>49</sup>.

296 **Discussion**

297 In this study, we use a unique combination long- and short-read data to obtain an evolutionary  
298 framework of environmental diversity and infer habitat preference evolution across the eukaryotic  
299 tree. High-throughput long-amplicon sequencing followed by careful processing of the data provide  
300 high-quality sequences containing improved phylogenetic signal for the vast environmental  
301 diversity<sup>28,50-52</sup>. We generated over 10 million long-read metabarcoding data spanning the eukaryotic  
302 rDNA operon, which assembled into nearly 17,000 OTUs, for marine and terrestrial ecosystems. We  
303 then added two additional layers of phylogenetic information: (i) a much larger mass of available  
304 short-read metabarcoding data to more deeply cover the molecular diversity of environmental  
305 microbes, and (ii) a set of well-accepted constraints derived from published phylogenomic analyses to  
306 fix the backbone of our eukaryotic tree. By combining all this information, we show that we can infer  
307 evolutionary patterns at global scales across the tree.

308 We confirm that the salt barrier has been a major factor in shaping eukaryotic diversity<sup>6,14,16</sup>, and that  
309 marine-terrestrial transitions are infrequent in comparison to transitions across other habitats such as  
310 between freshwater and soil (Figure 1). Our analyses detected at least 350 transition events (Figure 2),  
311 although this number is likely to be higher when considering more ancient transitions that were not  
312 detected, and more recent transitions that will only be revealed by sequencing more locations (for e.g.  
313 in<sup>24</sup>). These difficult-to-achieve environmental crossings have likely played important evolutionary  
314 roles by allowing colonizers to reach vacant ecological niches. For example, crossing the salt barrier  
315 may have led to the establishment of some major eukaryotic assemblages such as TSAR, or highly  
316 diverse lineages such as the oomycetes and vampyrellids (Supplementary Figure 12). Marine-  
317 terrestrial transitions have also allowed lineages such as diatoms, golden algae and spirotrich ciliates  
318 to expand their range to both habitats, contributing to the diversification of the vast eukaryotic  
319 diversity we see today. We unexpectedly found that 56% of the detected transitions occurred recently,  
320 in the last 10% of the evolutionary history of the respective groups (Figure 3), which is in contrast to a  
321 common idea that most marine-terrestrial transitions are ancient<sup>14</sup>. It is however unclear why  
322 colonization across the salt barrier would be more frequent in recent geological time, so this  
323 observation could instead be due to recent colonizing lineages having had less time to go extinct, and



324 thus more likely to be represented in our generated phylogenies<sup>53</sup>. At its deepest phylogenetic level,  
325 our analyses suggest that the earliest eukaryotes inhabited terrestrial habitats (Figure 4) and not marine  
326 habitats as often assumed (e.g.<sup>54–56</sup>). While the fossil record for early eukaryotes is sparse and difficult  
327 to distinguish from prokaryotes, there is evidence for early eukaryotes in non-marine or low salinity  
328 environments from at least 1 Gyr ago<sup>55</sup>. Furthermore, other key early eukaryotic innovations, such as  
329 the origin of the plastid organelles, have been inferred to have occurred around 2 Gyr ago in low-  
330 salinity habitats<sup>57,58</sup>. Terrestrial environments are known to be more heterogenous<sup>59</sup>, and may thus  
331 have provided a wide range of ecological niches for early eukaryotes to occupy.

332 Our detailed investigation across the main groups of eukaryotes showed marked differences in the  
333 rates of crossing the salt barrier (200-fold globally). While some groups have low global transition  
334 rates, others show a higher tendency to cross this physiological barrier. Most notably, we inferred  
335 based on both the highest transition rates in our analysis and relatively high number of transition  
336 events (Figure 2), that fungi are the strongest eukaryotic colonizers between marine and terrestrial  
337 environments. This is consistent with previous studies documenting a multitude of close evolutionary  
338 associations between marine and terrestrial fungal lineages<sup>60–62</sup>, which in turn suggests that many  
339 fungal species may be generalists that can tolerate a wide range of salinities<sup>63,64</sup>. Interestingly, fungi  
340 showed a much greater trend (21-fold) for colonizing terrestrial environments, where they are  
341 dominant, than the reverse. Whether this reflects a strong preference for terrestrial environments, or  
342 instead unequal diversification rates in the two habitats<sup>65,66</sup>, or both, is unclear and should be further  
343 investigated.

344 The differences in habitat transition rates across eukaryotes are likely the result of varying salinity  
345 tolerance that has prevented successful colonization events during the evolution in some groups.  
346 Among algae, comparative genomics showed large differences in gene content between marine and  
347 freshwater species, notably for ion transporters and other membrane proteins that likely play important  
348 roles in osmoregulation<sup>67</sup>. These different gene contents may be due, at least in part, to laterally  
349 acquired genes (LGT) that could facilitate successful crossing of the salt barrier, as proposed for other  
350 environmental adaptations<sup>68–72</sup>. In bacteria, it was hypothesized that particle-associated species can

351 more easily cross the salt-barrier due to increased chances of acquiring osmoregulation-related genes  
352 through LGT<sup>73</sup>. Altogether, these observations raise the question of how protists in general acquire  
353 these genes, for example groups like diatoms (Supplementary Figures 11-12) which showed multiple  
354 transitions in both directions, and whether it is through LGT (as has been shown for some halophilic  
355 protists<sup>68</sup>), gene duplication, or through re-wiring of existing metabolic pathways (as shown for the  
356 SAR11 bacteria<sup>74</sup>). Other ecological factors also likely play a role as a colonizing organism does not  
357 only need to adapt to a different salinity, but also has to adapt to the different nutrient and ion  
358 availabilities, and avoid being out-competed or preyed on by the resident community<sup>73</sup>.

## 359 **Conclusions**

360 This study represents the first comprehensive analysis of the evolution of saline and non-saline habitat  
361 preferences across the global tree of eukaryotes. We inferred that two of the largest assemblages of  
362 eukaryotes (TSAR and Amorphea) originated in different environments, and that ancestral eukaryotes  
363 likely inhabited non-marine environments. Our results show that marine and non-marine communities  
364 are phylogenetically distinct, but the salt barrier has been crossed several hundred times over the  
365 course of eukaryotic evolution. Several of these crossings coincided with the birth of diverse lineages,  
366 indicating that the availability of new niches has likely played a large role in the vast eukaryotic  
367 diversity we see today. We predict that the generation of genomic data from closely related marine and  
368 non-marine lineages will shed light on the genetic and cellular adaptations that have allowed crossings  
369 over the salt barrier.

## 370 **Methods**

### 371 **Environmental samples for long-read metabarcoding and total DNA extraction**

372 A total of 18 samples were sequenced for this study: five freshwater samples, four soil samples, four  
373 marine euphotic samples, and five marine aphotic samples (see Supplementary Table 1 for sample  
374 coordinates and details). Additionally, we used reads from three soil samples that were sequenced in a  
375 previous study<sup>28</sup> (ENA accession PRJEB25197), resulting in a total of 21 samples that were analysed  
376 in this study. The aim here was to get a representative view of the microbial eukaryotic diversity in  
377 each environment.

378

379 Soil samples (x4 samples)

380 Peat samples were collected from (1) Skogaryd mire and (2) Kallkäls mire in October-November  
381 2019. 5ml samples with three to four replicates of the top layer of soil were collected at both sites and  
382 visible roots were removed. Samples were kept at 4°C for two days before extracting DNA using the  
383 DNeasy PowerSoil Kit (Qiagen). We also obtained DNA extracted from: (3) rainforest soil samples  
384 (six sites) from Puerto Rico<sup>75</sup>, and (4) boreal forest soil samples (six sites) from Sweden<sup>76</sup>.

385

386 Freshwater samples (x5 samples)

387 We sampled three freshwater lakes in Sweden in October-November 2019: (1) Lake Erken, (2) Lake  
388 Ersjön, and (3) Lake Stortjärn. Planktonic samples were collected from the middle of the lakes at  
389 multiple depths, and mixed. Up to 3L of water was pre-filtered through a 200 µm mesh net to remove  
390 larger organisms before sequentially filtering through 20-25 µm, 3 µm, and 0.25 µm polycarbonate  
391 filters (47 mm). Filters were immediately frozen at -20°C and stored at -70°C before further  
392 processing. We also collected a (4) freshwater sediment sample (four replicates) from Lake Erken. The  
393 upper 0-5 cm of a sediment core was separated and mixed. All samples were kept at 4°C before  
394 processing and extracting DNA using the DNeasy PowerSoil Kit. Lastly, we obtained DNA from (5)  
395 10 permafrost thaw ponds in Canada<sup>77</sup>.

396

397 Marine euphotic samples (x4 samples)

398 One 5L sample was collected from the (1) North Sea at a depth of 5 m. Water was processed, and  
399 DNA extracted as described for the freshwater water samples. We used DNA extracts from the nano  
400 (3-20 µm) and pico (0.2-3 µm) fractions of two stations from the Malaspina expedition (Stations 49  
401 and 76)<sup>78</sup>. These extracts corresponded to one (2) surface sample at 3 m depth, and (3-4) two DCM  
402 layer samples at depths of 70 m and 85 m.

403

404 Marine aphotic samples (x5 samples)

405 We used DNA extracts from the nano and pico fractions of the aphotic marine environment from  
406 Malaspina stations 49 and 76<sup>78</sup>. These corresponded to depths of (1-2) 275 m and 800 m for the  
407 mesopelagic, and (3-4) 1200 m and 2800-3300 m for the bathypelagic samples. Lastly, we obtained  
408 (5) DNA from a Mariana Trench sample from a depth of 5900 m<sup>79</sup>.

409

410 **PCR amplification and long-read sequencing**

411 We amplified a ~4500 bp fragment of the ribosomal DNA operon, spanning the 18S gene, ITS region,  
412 and 28S gene, using the general eukaryotic primers 3NDf<sup>80</sup> and 21R<sup>81</sup>. PCRs were performed with  
413 sample-specific tagged-primers using the Takara LA Taq polymerase (Takara) and 5 ng of DNA as  
414 input. PCR-cycling conditions included an initial denaturation step at 94°C for 5 min, at least 25 cycles  
415 of denaturation at 98°C for 10 sec, primer annealing at 60°C for 30 sec, and elongation at 68°C for 5  
416 min, and finishing with a final elongation step at 68°C for 10 min. We limited the number of PCR  
417 cycles to 25, where possible, to reduce chimera formation<sup>82</sup>. For samples that did not get amplified, we  
418 increased the number of cycles to 30. PCR products were assessed using agarose gels and Qubit 2.0  
419 (Life Technologies), and then purified with Ampure XP beads (Beckman Coulter). Amplicons from  
420 replicates and different sites from the same sampling location were pooled at this stage. SMRTbell  
421 libraries were constructed using the HiFi SMRTbell Express Template Prep Kit 2.0. Long-read  
422 sequencing was carried out at SciLifeLab (Uppsala, Sweden) on the Sequel II instrument (Pacific  
423 Biosciences) on a SMRT Cell 8M Tray (v3), generating four 30-hour movies.

424

425 **Processing reads and OTU clustering**

426 We QC filtered sequences following<sup>28</sup> with some modifications. The CCS filtration pipeline is  
427 available at<sup>83</sup>. Briefly, Circular Consensus Sequences (CCS) were generated by SMRT Link  
428 v8.0.0.79519 with default options. The CCS reads were demultiplexed with mothur v1.39.5<sup>84</sup>, and then  
429 filtered with DADA2 v1.14.1<sup>85</sup>. Reads were retained if they had both primers and if the maximum  
430 number of expected errors was four (roughly translating to one error for every thousand base pairs).  
431 We pre-clustered reads at 99% similarity using VSEARCH v2.3.4<sup>86</sup>, and generated consensus

432 sequences for pre-clusters  $\geq 3$  reads to denoise the data. Prokaryotic sequences were detected by  
433 BLASTing<sup>87</sup> against the SILVA SSU Ref NR 99 database v132<sup>88</sup> and removed. We predicted 18S and  
434 28S sequences in the reads using Barrnap v0.7 (--reject 0.4 --kingdom euk)<sup>89</sup>, and discarded non-  
435 specific and artefactual reads (i.e. those containing multiple 18S/28S, or missing 18S/28S). Chimeras  
436 were detected *de novo* using Uchime<sup>90</sup> as implemented in mothur. Finally, we extracted the 18S and  
437 28S sequences from the reads and clustered them using VSEARCH into Operational Taxonomic Units  
438 (OTUs) at 97% similarity. After discarding singletons, a second round of *denovo* chimera detection  
439 was performed using VSEARCH, and chimeric OTUs were removed. We calculated sequence  
440 similarity of the OTUs against reference sequences in a custom PR<sup>2</sup> database<sup>30</sup> (*PR2-transitions*<sup>31</sup>; see  
441 below) using VSEARCH (--usearch\_global and --iddef 1). All references and OTU sequences were  
442 trimmed with the primers 3ndf and 1510R<sup>91</sup> to ensure that they spanned the same region.

443

#### 444 **Taxonomic annotation of long-read sequences**

##### 445 *The modified PR2 reference database*

446 Reference sequences were derived from a modified version of the Protist Ribosomal Reference (PR2)  
447 database v4.12.0<sup>30</sup>, called *PR2\_transitions*. This database revised the taxonomy structure of PR2 to 9  
448 levels: Domain, Supergroup, Division, Subdivision, Class, Order, Family, Genus, Species. This  
449 allowed us to update the taxonomy to accommodate recent changes in eukaryotic classification<sup>92</sup>  
450 (changes in taxonomy can be viewed at <sup>83</sup>). Additionally, we added sequences from nucleomorphs, and  
451 several newly discovered or sequenced lineages such as Rhodophyta, Hemismastigophora, and others.  
452 *PR2\_transitions* is available on Figshare<sup>31</sup>. We used the 18S gene alone for taxonomic annotation, as  
453 28S databases are much less comprehensive by comparison.

454

##### 455 *Phylogeny-aware taxonomy assignment*

456 We used a phylogeny-aware approach to assign taxonomy to the PacBio OTUs, as done in<sup>28</sup>. This  
457 approach assigns taxonomy to the appropriate taxonomic rank, such that OTUs branching deep in the  
458 eukaryotic tree are labelled to high taxonomic ranks, and vice versa. For each sample, we inferred  
459 preliminary maximum likelihood trees along with SH-like support<sup>93</sup> with RAxML v8<sup>32</sup> (using the

460 GTRCAT approximation as it is better suited for large trees<sup>94</sup>). These trees contained the filtered  
461 OTUs and closely related reference sequences from *PR2\_transitions*. Trees were scanned manually to  
462 identify mis-annotated reference sequences, nucleomorphs, and artefactual OTUs. After removing  
463 these sequences, we inferred trees with RAxML-NG<sup>95</sup> using 20 starting trees.

464

465 The final taxonomy was generated by getting the consensus of two strategies. Strategy 1 parses the  
466 tree and propagates taxonomy to the OTUs from the nearest reference sequences using the Genesis<sup>96</sup>  
467 app *partial-tree-taxassign*<sup>97</sup>. Strategy 2 starts by pruning the OTUs from the phylogeny, leaving  
468 behind references only. OTUs are then phylogenetically placed on the tree with EPA-ng v0.3.5<sup>34</sup>, and  
469 taxonomy assigned using the gappa<sup>96</sup> command *assign* under the module *examine*. The resulting  
470 taxonomy of the 18S gene of each OTU was transferred to its 28S gene counterpart, as the molecules  
471 are physically linked.

472

#### 473 **Maximum likelihood analyses of the global eukaryotic dataset**

474 18S and 28S sequences were aligned using MAFFT v7.310<sup>98</sup> using the FFT-NS-2 strategy, and  
475 subsequently trimmed with trimAl<sup>99</sup> to remove sites with >95% gaps. We inferred preliminary trees  
476 from a concatenated alignment with RAxML v8.2.12 under the GTRCAT model<sup>32</sup> which were then  
477 visually inspected to detect chimeras and sequence artefacts. Taxa were removed if their position in  
478 the tree did not match their taxonomy. Four such rounds of visual inspection were performed, two  
479 with unconstrained trees, and two with constrained trees (see text below for details on constraints). To  
480 avoid long branch attraction, we excluded rapidly evolving taxa using TreeShrink<sup>100</sup> (k=2500). This  
481 resulted in the removal of *Mesodinium*, long-branch Microsporidia, several Apicomplexa, several  
482 Heterolobosea, and several Colladaria from our dataset.

483

484 After removing chimeras and sequence artefacts, we realigned and trimmed the 18S and 28S  
485 sequences as before. After concatenation, the final dataset was composed of 16,821 taxa and 7,160  
486 alignment sites. Global eukaryotic phylogenies of the taxonomically annotated, 18S-28S  
487 environmental sequences were inferred using RAxML v8.2.12 under the GTRCAT model<sup>32</sup>, and 100

488 transfer bootstrap replicates (TBE)<sup>101</sup>. Supergroups, Divisions, and Subdivisions (ranks 2, 3 and 4 in  
489 *PR2\_transitions*) were constrained to be monophyletic in our tree (i.e. all taxa labelled as a specific  
490 subdivision were constrained to be on one side of a split). The one exception was Excavata whose  
491 monophyly has not been confidently resolved<sup>29</sup>. One hundred maximum likelihood inferences were  
492 performed in order to take phylogenetic uncertainty into account for subsequent ancestral state  
493 reconstruction analyses. We opted to include only the long-read environmental sequences in our  
494 phylogenies because they better represent environmental diversity (compared to reference databases  
495 which are more biased towards culturable organisms and marine environments<sup>102</sup>), and because very  
496 few 18S-28S sequences can otherwise be ascertained to derive from the same organism. The final tree  
497 along with metadata was visualised using the anvio interface<sup>103</sup> and then modified in Adobe  
498 Illustrator<sup>104</sup> to label clades.

499

## 500 **Short read datasets**

### 501 Datasets collected

502 Short-read data corresponding to the V4 hypervariable region were retrieved from 22 publicly  
503 available metabarcoding datasets. Data were considered if the following criteria were fulfilled: (i)  
504 samples were collected from soils, freshwater, or marine habitats (ii) there was clear association  
505 between samples and environment (i.e. no data from estuaries where salinity fluctuates); and (iii) data  
506 publicly available or authors willing to share. The search for studies was not meant to be exhaustive  
507 and the datasets included in this work were identified and collected by the end of October 2020, unless  
508 specified otherwise. A list of these datasets can be found in Supplementary Table 3.

509

### 510 Processing short-read data and clustering into OTUs

511 Raw sequence files and metadata were downloaded from NCBI SRA web site<sup>105</sup> when available or  
512 obtained directly from the investigators. Information about the study and the samples (substrate, size  
513 fraction etc.) as well as the available metadata (geographic location, depth, date, temperature etc.)  
514 were stored in three distinct tables in a custom MySQL database stored on Google Cloud. For each  
515 study, raw sequences files were processed independently de novo. Primer sequences were removed

516 using cutadapt<sup>106</sup> (maximum error rate = 10%). Amplicon processing was performed under the R  
517 software<sup>107</sup> using the dada2 package<sup>85</sup>. Read quality was visualized with the function  
518 *plotQualityProfile*. Reads were filtered using the function *filterAndTrim*, adapting parameters  
519 (truncLen, minLen, truncQ, maxEE) as a function of the overall sequence quality. Merging of the  
520 forward and reverse reads was done with the *mergePairs* function using the default parameters  
521 (minOverlap = 12, maxMismatch = 0). Chimeras were removed using *removeBimeraDenovo* with  
522 default parameters. Taxonomic assignment of ASVs was performed using the *assignTaxonomy*  
523 function from dada2 against the PR2 database<sup>30</sup> version 4.12 (<https://pr2-database.org>). ASV  
524 assignment and ASV abundance in each sample were stored in two tables in the MySQL database.  
525 ASV information was retrieved from the database using an R script.

526  
527 ASVs from each environment (freshwater, soil, marine euphotic, marine aphotic) were clustered into  
528 OTUs at 97% similarity using VSEARCH<sup>86</sup>, to make the size of the dataset more manageable for  
529 subsequent phylogenetic analyses. To be conservative in what was considered to be present in an  
530 environment, we retained only those OTUs that were composed of at least 100 reads, or were present  
531 in multiple distinct samples.

532  
533 **Phylogenetic placement on global eukaryote phylogeny**  
534 Short-read OTUs were aligned against the long-read alignment (see **Maximum likelihood analyses of**  
535 **the global eukaryotic dataset**) using the phylogeny-aware alignment software PaPaRa<sup>108</sup>. Misaligned  
536 sequences were systematically checked and removed. OTUs from the four environments were then  
537 phylogenetically placed on the global eukaryote tree (the tree with the highest likelihood) using EPA-  
538 ng<sup>34</sup>. OTUs with high EDPL (expected distance between placement locations) indicate uncertainty in  
539 placement, and were filtered out with the gappa command *edpl*<sup>96</sup>. The resulting jplace files were  
540 visualised with iTOL<sup>109</sup>.

541



## 542 **Inferring clade specific phylogenies with short- and long-read data**

543 In order to investigate clade-specific transition rates across the salt barrier, we inferred phylogenies for  
544 major eukaryotic groups. We considered only those clades that contained sufficient data to more  
545 precisely infer transition rates; i.e. both terrestrial and marine taxa were present, and there were at least  
546 50 taxa present. This excluded taxa such as radiolarians (which contains no terrestrial taxa), rigifilids  
547 (which contains only terrestrial taxa), and tubulineans (which is predominantly terrestrial with an  
548 extremely small proportion of marine taxa). After preliminary analyses, we also excluded the clades  
549 discobans and discoseans due to large topological differences in the resulting trees.  
550 We extracted all short-read OTUs from the remaining 13 clades using the gappa subcommand *extract*.  
551 Short-read OTUs taxonomically annotated as anything other than the respective clade were discarded  
552 (for instance we discarded sequences labelled as amoebozoans that were phylogenetically placed in  
553 apicomplexa). For each clade, we pruned the corresponding subtree (and an outgroup) from the global  
554 phylogeny with the best likelihood score. For each clade, we then inferred 100 ML phylogenies with  
555 RAxML (GTRCAT model), using the long-read subtree as a backbone constraint.

556

## 557 **Analyses of habitat evolution**

### 558 Unifrac analyses

559 To estimate whether microbial communities from various habitats were phylogenetically distinct, we  
560 calculated unweighted UniFrac distance<sup>110</sup> as implemented in mothur, between (1) marine and  
561 terrestrial habitats, (2) marine euphotic, marine aphotic, soil, and freshwater, and (3) each sample  
562 sequenced with PacBio. Distances were estimated along the best ML global eukaryotic phylogeny  
563 with 1000 randomisations in order to test for statistical significance.

564 Similarly, we estimated pairwise Kantorovich-Rubinstein distance (earth mover's distance) between  
565 the four habitats (soil, freshwater, marine euphotic, marine aphotic) using the gappa subcommand *krd*  
566 with the short-read placement files (jplace files) as input (See **Phylogenetic placement on global  
567 eukaryotic phylogeny**).

568

569 *Model test on global eukaryotic phylogeny*

570 To investigate whether transition rates vary between major eukaryotic clades, we compared a null  
571 model (qMT and qTM remain constant throughout the global eukaryotic tree) against a complex  
572 model (qMT and qTM estimated separately for each major eukaryotic clade) on the global eukaryotic  
573 phylogeny. These models were compared using MCMC analyses in BayesTraits v3.0.2<sup>111,112</sup> in a  
574 reversible-jump framework in order to avoid over-parameterization<sup>113</sup>. Following the analysis in<sup>114</sup>,  
575 we used 50 stones and a chain length of 5,000 to obtain marginal likelihood for each model using  
576 stepping stone method<sup>115</sup>, and a Log Bayes Factor (2 \* difference of log marginal likelihoods) of 10 or  
577 more was used to favour the complex model over the simple model.

578 Before final analyses in BayesTraits, we tried several prior distributions for transition rates (using a  
579 hyperprior approach to reduce uncertainty about prior choice<sup>113</sup>). Specifically we compared gamma  
580 hyperpriors with exponential hyperpriors using different values. While the different priors produced  
581 qualitatively similar results, we found the exponential hyperprior to be most suitable. All BayesTraits  
582 analyses were therefore carried out using an exponential hyperprior with the mean seeded from a  
583 uniform distribution between 0 and 2. Additionally, all ancestral state reconstruction analyses were  
584 carried out on 100 inferred phylogenies to take phylogenetic uncertainty into account, and were  
585 repeated thrice to check for convergence.

586

587 *Clade specific transition rates*

588 We inferred clade-specific transition rates along the clade-specific phylogenies (long-read + short-read  
589 data), on account of these being more complete. The metadata for each taxon was used to label it as  
590 either marine or terrestrial. We ran 1 million generations on each tree (100 million generations in total)  
591 with 0.5 million generations discarded as burn-in. For each clade, we also inferred the global transition  
592 rate, regardless of the direction of transition. This was achieved by normalising the QMatrix<sup>116,117</sup>, with  
593 all other parameters unchanged. These analyses also allowed us to infer the ancestral state of each  
594 major eukaryotic clade.

595

596 *Inferring ancestral states of deep nodes and the last common ancestor of eukaryotes*

597 In order to infer the ancestral habitats at deeper nodes (including the origin of eukaryotes), we  
598 modelled habitat evolution along the global eukaryotic phylogeny using the better suited complex  
599 model. Analyses were run for 500 million generations, forcing BayesTraits to spend 5 million  
600 generations on each tree, and 200 million generations were discarded as burn-in. Analyses were  
601 carried out after rooting the tree at Discoba, and at Amorphea in order to take uncertainty about the  
602 root into account.

603

#### 604 Visualising scenarios of habitat evolution

605 Most ancestral state reconstruction programmes do not explicitly calculate the ancestral state at  
606 internal nodes (but integrate over all possibilities). In order to visualise habitat evolution, we used  
607 PastML, a maximum likelihood ancestral state reconstruction programme which calculates the state at  
608 each internal node, and also generates a concise visual summary of the clade. For each major  
609 eukaryotic clade, we ran PastML on 100 trees. Visualisations for several trees were checked manually  
610 to assess if they displayed similar histories, and one visualisation was chosen randomly for display in  
611 Supplementary Figure 12.

612

#### 613 Counting number and relative timing of transitions

614 We converted all clade-specific phylogenies into relative chronograms (with the age of the root set to  
615 1) using Pathd8<sup>38</sup> which is suitable for large phylogenies. We ran PastML on these phylogenies (as  
616 before), and used custom scripts<sup>83</sup> to count the number of marine-terrestrial transitions. For each  
617 transition, we calculated the distance to the root to obtain relative timing of transition.

618

#### 619 **Network analyses**

620 To check that our results about transition rates and timings were not biased by phylogenetic inference  
621 from sequences with poor phylogenetic signal, we constructed sequence similarity networks. These  
622 networks were constructed using representative 18S sequences of the long-read OTUs. Briefly, we  
623 performed all-against-all BLAST searches, and generated networks using a coverage threshold of 75,

624 and sequence identity thresholds of 80, 85, 90, 95, 97. Networks were visualized on Cytoscape<sup>118</sup>.

625 Assortativities were calculated using scripts available at <sup>119</sup>, and then plotted in R using *ggplot*<sup>120</sup>.

626

### 627 **Data availability**

628 New sequence data generated for this study were deposited at ENA under the accession number

629 PRJEB45931, while data from Sequel I (generated in <sup>28</sup>) were deposited under the accession number

630 PRJEB25197. The *PR2-transitions* database, annotated 18S and 28S OTU sequences, clustered short

631 read metabarcoding sequences used in this study, and all trees have been deposited in an online

632 repository<sup>31</sup>. All custom code is available here<sup>83</sup>.

633

### 634 **Acknowledgments**

635 We want to thank Anna Rosling, Hector Urbina, and Matias Cafaro for kindly providing DNA from

636 soil samples collected in Sweden and Puerto Rico. We thank the pilots of the deep-sea HOV “Jiao

637 Long Hao” and the crew of the R/Vs “Xiang Yang Hong 09” for their professional service during

638 cruise DY37II to collect samples from the Mariana Trench. We are grateful to the Swedish

639 Infrastructure for Ecosystem Science (SITES) for collecting samples from Swedish lakes, and Swedish

640 Meteorological and Hydrological Institute (SMHI) for collecting a sample from the North Sea. Marine

641 sampling was supported by the Spanish Ministry of Economy, Competitiveness projects Malaspina-

642 2010 (CSD2008–00077) and ALLFLAGS (CTM2016-75083-R). We would like to thank Éléna

643 Coulier for her help with optimising the long-range PCRs. We thank Olga V. Petterson and Christian

644 Tellgren-Roth for designing fusion primers for long-read amplification. We thank Miguel M. Sandin

645 for his help with network analyses, and Jesper Boman for help with awk scripting. We thank Javier del

646 Campo for his advice on updating taxonomy for our custom PR2 database. We thank the ABIMS

647 platform of FR2424 (CNRS, Sorbonne Université) for bioinformatics resources. The authors would

648 like to acknowledge support of the National Genomics Infrastructure (NGI) / Uppsala Genome Center

649 and UPPMAX for providing assistance in massive parallel sequencing and computational

650 infrastructure (SNIC 2021/5-302). Work performed at NGI / Uppsala Genome Center has been funded

651 by RFI / VR and Science for Life Laboratory, Sweden. This work was supported by a grant from

652 Science for Life Laboratory available to F.B., which covered the salary of M.J., and experimental  
653 expenses.

654

#### 655 **Author contributions**

656 F.B. and M.J. conceived the project. M.J., H.J., S.P., and R.M. collected samples and extracted DNA.  
657 M.J. carried out long-range PCRs and processed the PacBio data. C.B. and D.V. collected and  
658 processed short-read metabarcoding data. A.O. performed comparisons of long and short-read  
659 metabarcoding data. M.J. and C.B. performed phylogenetic and ancestral state reconstruction analyses.  
660 M.J. and F.B. wrote the first draft of the manuscript and all authors read and commented on the  
661 manuscript. F.B. supervised the project.

662

#### 663 **References**

664

- 665 1. Simpson, G. G. *The Major Features of Evolution*. *The Major Features of Evolution* (Columbia  
666 University Press, 1953). doi:10.7312/simp93764.
- 667 2. Losos, J. B. Adaptive radiation, ecological opportunity, and evolutionary determinism :  
668 American society of naturalists E. O. Wilson award address. *Am. Nat.* **175**, 623–639 (2010).
- 669 3. Osborn, H. F. The Law of Adaptive Radiation. *Am. Nat.* **36**, 353–363 (1902).
- 670 4. Yoder, J. B. *et al.* Ecological opportunity and the origin of adaptive radiations. *Journal of*  
671 *Evolutionary Biology* vol. 23 1581–1596 (2010).
- 672 5. Robertson, G. P. *et al.* Soil resources, microbial activity, and primary production across an  
673 agricultural ecosystem. *Ecol. Appl.* **7**, 158–170 (1997).
- 674 6. Singer, D. *et al.* Protist taxonomic and functional diversity in soil, freshwater and marine  
675 ecosystems. *Environ. Int.* **146**, (2021).
- 676 7. Miller, M. F. & Labandeira, C. C. Slow Crawl Across the Salinity Divide: Delayed A  
677 Colonization of Freshwater Ecosystems by Invertebrates. *GSA Today* **12**, 4–9 (2002).
- 678 8. Cnaani, A. & Hulata, G. *Improving Salinity Tolerance in Tilapias: Past Experience and Future*  
679 *Prospects*. *The Israeli Journal of Aquaculture-Bamidgeh*.

- 680 9. Eiler, A. *et al.* Productivity and salinity structuring of the microplankton revealed by  
681 comparative freshwater metagenomics. *Environ. Microbiol.* **16**, 2682–2698 (2014).
- 682 10. Cabello-Yeves, P. J. & Rodriguez-Valera, F. Marine-freshwater prokaryotic transitions require  
683 extensive changes in the predicted proteome. *Microbiome* **7**, 117 (2019).
- 684 11. Hutchinson, G. E. *A treatise on limnology. Journal of Experimental Marine Biology and*  
685 *Ecology* (Wiley, 1967). doi:10.1016/0022-0981(94)90231-3.
- 686 12. Vermeij, G. J. & Dudley, R. Why are there so few evolutionary transitions between aquatic and  
687 terrestrial ecosystems? *Biol. J. Linn. Soc.* **70**, 541–554 (2000).
- 688 13. Lee, C. E. & Bell, M. A. Causes and consequences of recent freshwater invasions by saltwater  
689 animals. *Trends in Ecology and Evolution* vol. 14 284–288 (1999).
- 690 14. Logares, R. *et al.* Infrequent marine–freshwater transitions in the microbial world. *Trends*  
691 *Microbiol.* **17**, 414–422 (2009).
- 692 15. Paver, S. F., Muratore, D., Newton, R. J. & Coleman, M. L. Reevaluating the Salty Divide:  
693 Phylogenetic Specificity of Transitions between Marine and Freshwater Systems. *mSystems* **3**,  
694 (2018).
- 695 16. Filker, S. *et al.* Transition boundaries for protistan species turnover in hypersaline waters of  
696 different biogeographic regions. *Environ. Microbiol.* **19**, 3186–3200 (2017).
- 697 17. Cavalier-Smith, T. Megaphylogeny, cell body plans, adaptive zones: Causes and timing of  
698 eukaryote basal radiations. in *Journal of Eukaryotic Microbiology* vol. 56 (2009).
- 699 18. Carr, M. *et al.* A six-gene phylogeny provides new insights into choanoflagellate evolution.  
700 *Mol. Phylogenet. Evol.* **107**, (2017).
- 701 19. Simon, M., López-García, P., Moreira, D. & Jardillier, L. New haptophyte lineages and  
702 multiple independent colonizations of freshwater ecosystems. *Environ. Microbiol. Rep.* **5**, 322–  
703 332 (2013).
- 704 20. Bråte, J., Klaveness, D., Rygh, T., Jakobsen, K. S. & Shalchian-Tabrizi, K. Telonemia-specific  
705 environmental 18S rDNA PCR reveals unknown diversity and multiple marine-freshwater  
706 colonizations. *BMC Microbiol.* **10**, 168 (2010).
- 707 21. Shalchian-Tabrizi, K. *et al.* Diversification of unicellular eukaryotes: cryptomonad

- 708 colonizations of marine and fresh waters inferred from revised 18S rRNA phylogeny. *Environ.*  
709 *Microbiol.* **10**, 2635–2644 (2008).
- 710 22. European Journal of Phycology Genetic diversity of goniomonads: an ancient divergence  
711 between marine and freshwater species Genetic diversity of goniomonads: an ancient  
712 divergence between marine and freshwater species. *Eur. J. Phycol.* **39**, 343–350 (2010).
- 713 23. Žerdoner Čalasan, A., Kretschmann, J. & Gottschling, M. They are young, and they are many:  
714 dating freshwater lineages in unicellular dinophytes. *Environ. Microbiol.* **21**, (2019).
- 715 24. Annenkova, N. V., Giner, C. R. & Logares, R. Tracing the Origin of Planktonic Protists in an  
716 Ancient Lake. *Microorganisms* **8**, 543 (2020).
- 717 25. Annenkova, N. V., Hansen, G., Moestrup, Ø. & Rengefors, K. Recent radiation in a marine and  
718 freshwater dinoflagellate species flock. *ISME J.* **9**, 1821–1834 (2015).
- 719 26. Annenkova, N. V., Hansen, G. & Rengefors, K. Closely related dinoflagellate species in vastly  
720 different habitats—an example of a marine–freshwater transition. *Eur. J. Phycol.* **55**, 478–489  
721 (2020).
- 722 27. Obiol, A. *et al.* A metagenomic assessment of microbial eukaryotic diversity in the global  
723 ocean. *Mol. Ecol. Resour.* **20**, 718–731 (2020).
- 724 28. Jamy, M. *et al.* Long-read metabarcoding of the eukaryotic rDNA operon to phylogenetically  
725 and taxonomically resolve environmental diversity. *Mol. Ecol. Resour.* **20**, (2020).
- 726 29. Burki, F., Roger, A. J., Brown, M. W. & Simpson, A. G. B. The New Tree of Eukaryotes.  
727 *Trends Ecol. Evol.* **0**, (2019).
- 728 30. Guillou, L. *et al.* The Protist Ribosomal Reference database (PR2): a catalog of unicellular  
729 eukaryote Small Sub-Unit rRNA sequences with curated taxonomy. *Nucleic Acids Res.* **41**,  
730 D597–D604 (2012).
- 731 31. Jamy, M. *et al.* Transitions datasets. *Figshare* <https://doi.org/10.6084/m9.figshare.15164772.v1>  
732 (2021).
- 733 32. Stamatakis, A. RAxML version 8: a tool for phylogenetic analysis and post-analysis of large  
734 phylogenies. *Bioinformatics* **30**, 1312–1313 (2014).
- 735 33. Dunthorn, M. *et al.* Placing Environmental Next-Generation Sequencing Amplicons from

- 736 Microbial Eukaryotes into a Phylogenetic Context. *Mol. Biol. Evol.* **31**, 993–1009 (2014).
- 737 34. Barbera, P. *et al.* EPA-ng: massively parallel evolutionary placement of genetic sequences.  
738 *Syst. Biol.* **68**, 365–369 (2019).
- 739 35. Pagel, M. Detecting correlated evolution on phylogenies: A general method for the  
740 comparative analysis of discrete characters. *Proc. R. Soc. B Biol. Sci.* **255**, 37–45 (1994).
- 741 36. Ishikawa, S. A., Zhukova, A., Iwasaki, W., Gascuel, O. & Pupko, T. A Fast Likelihood Method  
742 to Reconstruct and Visualize Ancestral Scenarios. *Mol. Biol. Evol.* **36**, (2019).
- 743 37. Gottschling, M., Czech, L., Mahé, F., Adl, S. & Dunthorn, M. The windblown: possible  
744 explanations for dinophyte DNA in forest soils. *bioRxiv.org* 2020.08.07.242388 (2020).
- 745 38. Britton, T., Anderson, C. L., Jacquet, D., Lundqvist, S. & Bremer, K. Estimating Divergence  
746 Times in Large Phylogenetic Trees. *Syst. Biol.* **56**, 741–752 (2007).
- 747 39. Strassert, J. F. H., Irisarri, I., Williams, T. A. & Burki, F. A molecular timescale for eukaryote  
748 evolution with implications for the origin of red algal-derived plastids. *Nat. Commun.* **12**, 1–13  
749 (2021).
- 750 40. Parfrey, L. W., Lahr, D. J. G., Knoll, A. H. & Katz, L. A. Estimating the timing of early  
751 eukaryotic diversification with multigene molecular clocks. *Proc. Natl. Acad. Sci. U. S. A.* **108**,  
752 13624–13629 (2011).
- 753 41. Loron, C. C. *et al.* Early fungi from the Proterozoic era in Arctic Canada. *Nature* **570**, 232–235  
754 (2019).
- 755 42. Jewari, C. Al & Baldauf, S. L. The impact of incongruence and exogenous gene fragments on  
756 estimates of the eukaryote root. *bioRxiv* 2021.04.08.438903 (2021).
- 757 43. He, D. *et al.* An Alternative Root for the Eukaryote Tree of Life. *Curr. Biol.* **24**, 465–470  
758 (2014).
- 759 44. Derelle, R. & Lang, B. F. Rooting the eukaryotic tree with mitochondrial and bacterial  
760 proteins. *Mol. Biol. Evol.* **29**, 1277–1289 (2012).
- 761 45. Del Campo, J. *et al.* The others: Our biased perspective of eukaryotic genomes. *Trends in*  
762 *Ecology and Evolution* vol. 29 252–259 (2014).
- 763 46. BOADEN, P. J. S. Meiofauna and the origins of the Metazoa. *Zool. J. Linn. Soc.* **96**, 217–227



- 764 (1989).
- 765 47. Wiens, J. J. Faster diversification on land than sea helps explain global biodiversity patterns  
766 among habitats and animal phyla. *Ecol. Lett.* **18**, 1234–1241 (2015).
- 767 48. Oliverio, A. M. *et al.* The global-scale distributions of soil protists and their contributions to  
768 belowground systems. *Sci. Adv.* **6**, eaax8787 (2020).
- 769 49. Burki, F., Roger, A. J., Brown, M. W. & Simpson, A. G. B. *The New Tree of Eukaryotes*.  
770 *Trends in Ecology and Evolution* vol. 35 43–55 (2020).
- 771 50. Martijn, J. *et al.* Confident phylogenetic identification of uncultured prokaryotes through long  
772 read amplicon sequencing of the 16S-ITS-23S rRNA operon. *Environ. Microbiol.* 1462-  
773 2920.14636 (2019) doi:10.1111/1462-2920.14636.
- 774 51. Krehenwinkel, H. *et al.* Nanopore sequencing of long ribosomal DNA amplicons enables  
775 portable and simple biodiversity assessments with high phylogenetic resolution across broad  
776 taxonomic scale. *Gigascience* **8**, 1–16 (2019).
- 777 52. Furneaux, B., Bahram, M., Rosling, A., Yorou, N. S. & Ryberg, M. Long- and short-read  
778 metabarcoding technologies reveal similar spatiotemporal structures in fungal communities.  
779 *Mol. Ecol. Resour.* (2021) doi:10.1111/1755-0998.13387.
- 780 53. Nee, S., Holmes, E. C., May, R. M. & Harvey, P. H. Extinction rates can be estimated from  
781 molecular phylogenies. *Philos. Trans. - R. Soc. London, B* **344**, 77–82 (1994).
- 782 54. Knoll, A. H. Paleobiological perspectives on early eukaryotic evolution. *Cold Spring Harb.*  
783 *Perspect. Biol.* **6**, (2014).
- 784 55. Strother, P. K., Battison, L., Brasier, M. D. & Wellman, C. H. Earth's earliest non-marine  
785 eukaryotes. *Nature* **473**, 505–509 (2011).
- 786 56. Knoll, A. H., Javaux, E. J., Hewitt, D. & Cohen, P. Eukaryotic organisms in Proterozoic  
787 oceans. *Philosophical Transactions of the Royal Society B: Biological Sciences* vol. 361 1023–  
788 1038 (2006).
- 789 57. Sánchez-Baracaldo, P., Raven, J. A., Pisani, D. & Knoll, A. H. Early photosynthetic eukaryotes  
790 inhabited low-salinity habitats. *Proc. Natl. Acad. Sci. U. S. A.* **114**, E7737–E7745 (2017).
- 791 58. Blank, C. E. & SÁnchez-Baracaldo, P. Timing of morphological and ecological innovations in

- 792 the cyanobacteria - A key to understanding the rise in atmospheric oxygen. *Geobiology* **8**, 1–23  
793 (2010).
- 794 59. Hutchinson, G. E. *The Paradox of the Plankton*. *The American Naturalist* vol. 95.
- 795 60. Richards, T. A., Jones, M. D. M., Leonard, G. & Bass, D. Marine fungi: Their ecology and  
796 molecular diversity. *Ann. Rev. Mar. Sci.* **4**, (2012).
- 797 61. Amend, A. From Dandruff to Deep-Sea Vents: Malassezia-like Fungi Are Ecologically Hyper-  
798 diverse. *PLoS Pathog.* **10**, e1004277 (2014).
- 799 62. Orsi, W., Biddle, J. F. & Edgcomb, V. Deep Sequencing of Subseafloor Eukaryotic rRNA  
800 Reveals Active Fungi across Marine Subsurface Provinces. *PLoS One* **8**, (2013).
- 801 63. Klein, M., Swinnen, S., Thevelein, J. M. & Nevoigt, E. Glycerol metabolism and transport in  
802 yeast and fungi: established knowledge and ambiguities. *Environmental Microbiology* vol. 19  
803 878–893 (2017).
- 804 64. Kaserer, A. O., Andi, B., Cook, P. F. & West, A. H. Kinetic Studies of the Yeast His-Asp  
805 Phosphorelay Signaling Pathway. in *Methods in Enzymology* vol. 471 59–75 (Academic Press  
806 Inc., 2010).
- 807 65. Nakov, T., Beaulieu, J. M. & Alverson, A. J. Diatoms diversify and turn over faster in  
808 freshwater than marine environments\*. *Evolution (N. Y.)*. **73**, 2497–2511 (2019).
- 809 66. Maddison, W. P., Midford, P. E. & Otto, S. P. Estimating a Binary Character’s Effect on  
810 Speciation and Extinction. *Syst. Biol.* **56**, 701–710 (2007).
- 811 67. Nelson, D. R. *et al.* Large-scale genome sequencing reveals the driving forces of viruses in  
812 microalgal evolution. *Cell Host Microbe* (2021) doi:10.1016/j.chom.2020.12.005.
- 813 68. Czech, L. & Bremer, E. With a pinch of extra salt—Did predatory protists steal genes from  
814 their food? *PLoS Biology* vol. 16 e2005163 (2018).
- 815 69. Sibbald, S. J., Eme, L., Archibald, J. M. & Roger, A. J. Lateral Gene Transfer Mechanisms and  
816 Pan-genomes in Eukaryotes. *Trends in Parasitology* vol. 36 927–941 (2020).
- 817 70. Stairs, C. W. *et al.* Microbial eukaryotes have adapted to hypoxia by horizontal acquisitions of  
818 a gene involved in rhodoquinone biosynthesis. *Elife* **7**, (2018).
- 819 71. Savory, F. R., Milner, D. S., Miles, D. C. & Richards, T. A. Ancestral function and

- 820 diversification of a horizontally acquired oomycete carboxylic acid transporter. *Mol. Biol. Evol.*  
821 **35**, 1887–1900 (2018).
- 822 72. McDonald, S. M., Plant, J. N. & Worden, A. Z. The mixed lineage nature of nitrogen transport  
823 and assimilation in marine eukaryotic phytoplankton: A case study of *Micromonas*. *Mol. Biol.*  
824 *Evol.* **27**, 2268–2283 (2010).
- 825 73. Walsh, D. A., Lafontaine, J. & Grossart, H. P. On the eco-evolutionary relationships of fresh  
826 and salt water bacteria and the role of gene transfer in their adaptation. in *Lateral Gene*  
827 *Transfer in Evolution* vol. 9781461477 55–77 (Springer New York, 2013).
- 828 74. Eiler, A. *et al.* Tuning fresh: Radiation through rewiring of central metabolism in streamlined  
829 bacteria. *ISME J.* **10**, 1902–1914 (2016).
- 830 75. Urbina, H., Scofield, D. G., Cafaro, M. & Rosling, A. DNA-metabarcoding uncovers the  
831 diversity of soil-inhabiting fungi in the tropical island of Puerto Rico. *Mycoscience* **57**, 217–  
832 227 (2016).
- 833 76. Kalsoom Khan, F. *et al.* Naming the untouchable – environmental sequences and niche  
834 partitioning as taxonomical evidence in fungi. *IMA Fungus* **11**, 1–12 (2020).
- 835 77. Peura, S. *et al.* Ontogenic succession of thermokarst thaw ponds is linked to dissolved organic  
836 matter quality and microbial degradation potential. *Limnol. Oceanogr.* **65**, S248–S263 (2020).
- 837 78. Giner, C. R. *et al.* Marked changes in diversity and relative activity of picoeukaryotes with  
838 depth in the world ocean. *ISME J.* **14**, 437–449 (2020).
- 839 79. Jing, H., Zhang, Y., Li, Y., Zhu, W. & Liu, H. Spatial Variability of Picoeukaryotic  
840 Communities in the Mariana Trench. *Sci. Rep.* **8**, (2018).
- 841 80. Cavalier-Smith, T., Lewis, R., Chao, E. E., Oates, B. & Bass, D. *Helkesimastix marina* n. sp.  
842 (Cercozoa: Sainouroidea superfam. n.) a Gliding Zooflagellate of Novel Ultrastructure and  
843 Unusual Ciliary Behaviour. *Protist* **160**, 452–479 (2009).
- 844 81. Schwelm, A., Berney, C., Dixelius, C., Bass, D. & Neuhauser, S. The large subunit rDNA  
845 sequence of *Plasmodiophora brassicae* does not contain intra-species polymorphism. *Protist*  
846 **167**, 544–554 (2016).
- 847 82. Heeger, F. *et al.* Long-read DNA metabarcoding of ribosomal RNA in the analysis of fungi

- 848 from aquatic environments. *Mol. Ecol. Resour.* **18**, 1500–1514 (2018).
- 849 83. Jamy, M. Transitions-paper-scripts. *GitHub* <https://github.com/burki-lab/Transitions> (2021).
- 850 84. Schloss, P. D. *et al.* Introducing mothur: open-source, platform-independent, community-  
851 supported software for describing and comparing microbial communities. *Appl. Environ.*  
852 *Microbiol.* **75**, 7537–7541 (2009).
- 853 85. Callahan, B. J. *et al.* DADA2: High-resolution sample inference from Illumina amplicon data.  
854 *Nat. Methods* **13**, 581–583 (2016).
- 855 86. Rognes, T., Flouri, T., Nichols, B., Quince, C. & Mahé, F. VSEARCH: a versatile open source  
856 tool for metagenomics. *PeerJ* **4**, e2584 (2016).
- 857 87. Altschul, S. F., Gish, W., Miller, W., Myers, E. W. & Lipman, D. J. Basic local alignment  
858 search tool. *J. Mol. Biol.* (1990) doi:10.1016/S0022-2836(05)80360-2.
- 859 88. Quast, C. *et al.* The SILVA ribosomal RNA gene database project: improved data processing  
860 and web-based tools. *Nucleic Acids Res.* **41**, D590–D596 (2013).
- 861 89. tseemann/barnap: Bacterial ribosomal RNA predictor. <https://github.com/tseemann/barnap>.
- 862 90. Edgar, R. C., Haas, B. J., Clemente, J. C., Quince, C. & Knight, R. UCHIME improves  
863 sensitivity and speed of chimera detection. *Bioinformatics* **27**, 2194–2200 (2011).
- 864 91. Amaral-Zettler, L. A., McCliment, E. A., Ducklow, H. W. & Huse, S. M. A method for  
865 studying protistan diversity using massively parallel sequencing of V9 hypervariable regions of  
866 small-subunit ribosomal RNA Genes. *PLoS One* **4**, e6372 (2009).
- 867 92. Adl, S. M. *et al.* Revisions to the Classification, Nomenclature, and Diversity of Eukaryotes. *J.*  
868 *Eukaryot. Microbiol.* **66**, 4–119 (2019).
- 869 93. Guindon, S. *et al.* New algorithms and methods to estimate maximum-likelihood phylogenies:  
870 Assessing the performance of PhyML 3.0. *Syst. Biol.* **59**, 307–321 (2010).
- 871 94. Stamatakis, A. Phylogenetic models of rate heterogeneity: A high performance computing  
872 perspective. in *20th International Parallel and Distributed Processing Symposium, IPDPS*  
873 *2006* vol. 2006 (IEEE Computer Society, 2006).
- 874 95. Kozlov, A. M., Darriba, D., Flouri, T., Morel, B. & Stamatakis, A. RAxML-NG : A fast ,  
875 scalable , and user-friendly tool for maximum likelihood phylogenetic inference. *bioRxiv*

- 876 (2018).
- 877 96. Czech, L., Barbera, P. & Stamatakis, A. Genesis and Gappa: Processing, Analyzing and  
878 Visualizing Phylogenetic (Placement) Data. *bioRxiv* 647958 (2019) doi:10.1101/647958.
- 879 97. genesis-apps/partial-tree-taxassign.cpp at master · Pbdas/genesis-apps.  
880 <https://github.com/Pbdas/genesis-apps/blob/master/partial-tree-taxassign.cpp>.
- 881 98. Katoh, K. & Standley, D. M. MAFFT multiple sequence alignment software version 7:  
882 Improvements in performance and usability. *Mol. Biol. Evol.* **30**, 772–780 (2013).
- 883 99. Capella-Gutiérrez, S., Silla-Martínez, J. M. & Gabaldón, T. trimAl: A tool for automated  
884 alignment trimming in large-scale phylogenetic analyses. *Bioinformatics* **25**, 1972–1973  
885 (2009).
- 886 100. Mai, U. & Mirarab, S. TreeShrink: Fast and accurate detection of outlier long branches in  
887 collections of phylogenetic trees. *BMC Genomics* **19**, 23–40 (2018).
- 888 101. Lemoine, F. *et al.* Renewing Felsenstein’s phylogenetic bootstrap in the era of big data. *Nature*  
889 **1** (2018).
- 890 102. Mahé, F. *et al.* Parasites dominate hyperdiverse soil protist communities in Neotropical  
891 rainforests. *Nat. Ecol. Evol.* **1**, 0091 (2017).
- 892 103. Eren, A. M. *et al.* Community-led, integrated, reproducible multi-omics with anvi’o. *Nature*  
893 *Microbiology* vol. 6 3–6 (2021).
- 894 104. Adobe Inc. adobeillustrator.
- 895 105. Run Selector :: NCBI. <https://www.ncbi.nlm.nih.gov/Traces/study/>.
- 896 106. Martin, M. Cutadapt removes adapter sequences from high-throughput sequencing reads.  
897 *EMBnet.journal* **17**, 10 (2011).
- 898 107. R Core Team. R: A language and environment for statistical computing. (2013).
- 899 108. Berger, S. A., Krompass, D. & Stamatakis, A. Performance, Accuracy, and Web Server for  
900 Evolutionary Placement of Short Sequence Reads under Maximum Likelihood. *Syst. Biol.* **60**,  
901 291–302 (2011).
- 902 109. Letunic, I. & Bork, P. Interactive Tree Of Life (iTOL) v5: an online tool for phylogenetic tree  
903 display and annotation. *Nucleic Acids Res.* (2021).

- 904 110. Lozupone, C. & Knight, R. UniFrac: A new phylogenetic method for comparing microbial  
905 communities. *Appl. Environ. Microbiol.* **71**, 8228–8235 (2005).
- 906 111. Meade, A. & Pagel, M. BayesTraitsManual.  
907 <http://www.evolution.rdg.ac.uk/BayesTraitsV3.0.2/Files/BayesTraitsV3.0.2Manual.pdf>.
- 908 112. Pagel, M., Meade, A. & Barker, D. Bayesian Estimation of Ancestral Character States on  
909 Phylogenies. *Syst. Biol.* **53**, 673–684 (2004).
- 910 113. Pagel, M. & Meade, A. Bayesian analysis of correlated evolution of discrete characters by  
911 reversible-jump Markov chain Monte Carlo. *Am. Nat.* **167**, (2006).
- 912 114. Varga, T. *et al.* Megaphylogeny resolves global patterns of mushroom evolution. *Nat. Ecol.*  
913 *Evol.* **3**, 668–678 (2019).
- 914 115. Xie, W., Lewis, P. O., Fan, Y., Kuo, L. & Chen, M. H. Improving marginal likelihood  
915 estimation for bayesian phylogenetic model selection. *Syst. Biol.* **60**, 150–160 (2011).
- 916 116. Pagel, M. & Meade, A. The deep history of the number words. *Philos. Trans. R. Soc. B Biol.*  
917 *Sci.* **373**, (2018).
- 918 117. Baker, J. & Venditti, C. Rapid Change in Mammalian Eye Shape Is Explained by Activity  
919 Pattern. *Curr. Biol.* **29**, 1082-1088.e3 (2019).
- 920 118. Shannon, P. *et al.* Cytoscape: A software Environment for integrated models of biomolecular  
921 interaction networks. *Genome Res.* **13**, 2498–2504 (2003).
- 922 119. Sandin, M. M. Sequence Similarity Network (SSN). *GitHub*  
923 <https://github.com/MiguelMSandin/SSNetworks> (2021).
- 924 120. Wickham, H. *ggplot2: Elegant Graphics for Data Analysis.* (2016).
- 925
